CORRECTION

# Correction: Relation between Financial Market Structure and the Real Economy: Comparison between Clustering Methods

The *PLOS ONE* Staff

## Notice of Republication

This article was republished on April 8, 2015, to replace “fi” and “ff” character combinations missing in the Abstract and to correct formatting errors in several equations and figures. The publisher apologizes for the errors. Please download this article again to view the correct version. The originally published, uncorrected article and the republished, corrected article are provided here for reference.

## Supporting Information

**S1 File. Originally published, uncorrected article.**  
(PDF)

**S2 File. Republished, corrected article.**  
(PDF)

## Reference

1. Musmeci N, Aste T, Di Matteo T (2015) Relation between Financial Market Structure and the Real Economy: Comparison between Clustering Methods. PLoS ONE 10(3): e0116201. doi: [10.1371/journal.pone.0116201](https://doi.org/10.1371/journal.pone.0116201) PMID: [25786703](https://pubmed.ncbi.nlm.nih.gov/25786703/)

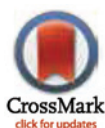

## OPEN ACCESS

**Citation:** The *PLOS ONE* Staff (2015) Correction: Relation between Financial Market Structure and the Real Economy: Comparison between Clustering Methods. PLoS ONE 10(4): e0126998. doi:10.1371/journal.pone.0126998

**Published:** April 20, 2015

**Copyright:** © 2015 The PLOS ONE Staff. This is an open access article distributed under the terms of the [Creative Commons Attribution License](https://creativecommons.org/licenses/by/4.0/), which permits unrestricted use, distribution, and reproduction in any medium, provided the original author and source are credited.
